# Supplementary material for: Master Regulator Analysis of the SARS-CoV-2/Human Interactome
Source: MDPI journal article supplement (doi:10.3390/jcm9040982), 2020-04-01

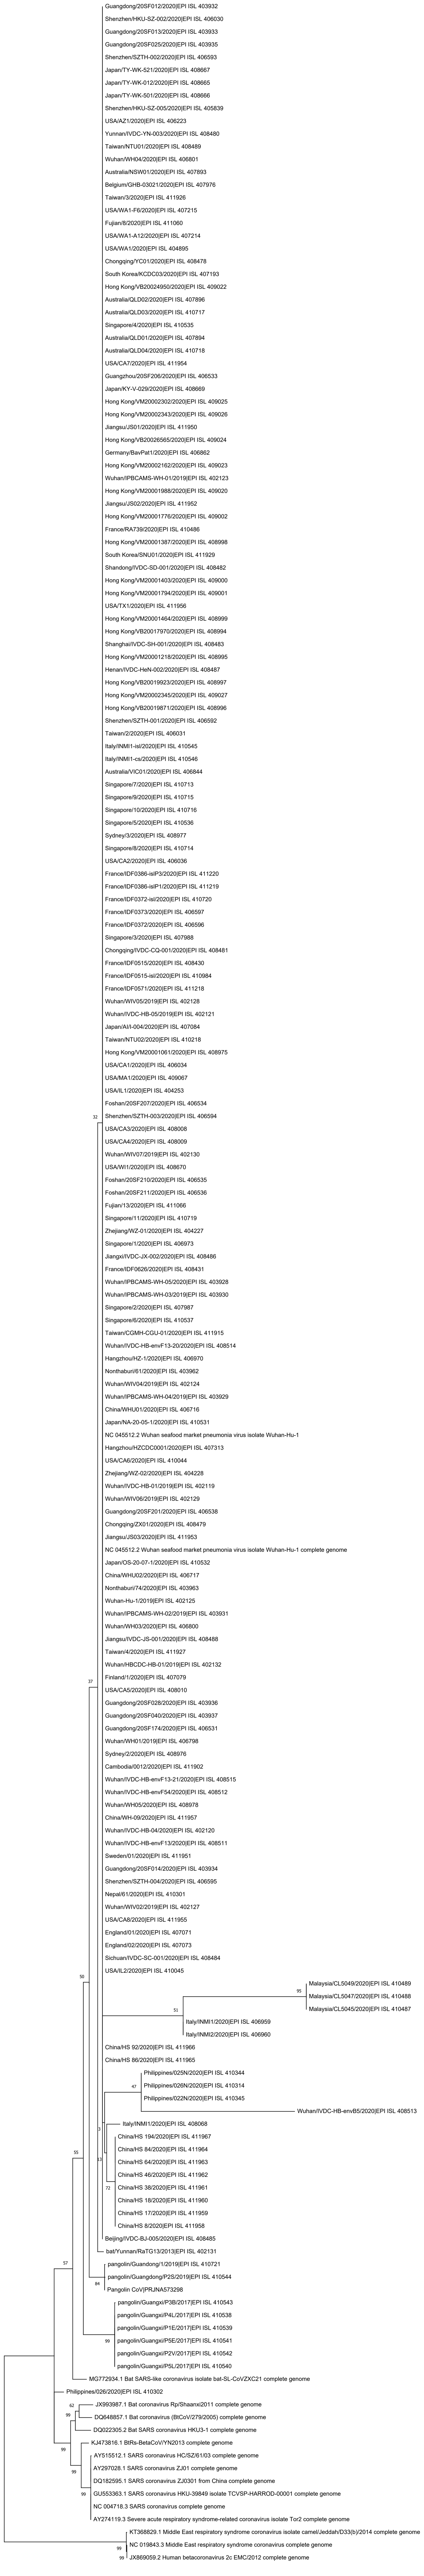

Supplement: s1 [file s1]
