# Supplementary material for: Master Regulator Analysis of the SARS-CoV-2/Human Interactome
Source: MDPI journal article supplement (doi:10.3390/jcm9040982), 2020-04-01
Supplement: s1 [file s1]

| human&pangolin | bat    | human&pangolin | bat    | human&pangolin | bat    |
|----------------|--------|----------------|--------|----------------|--------|
| ALA16          | THR16  | HIS228         | ARG228 | LEU568         | LYS568 |
| GLU23          | ASP23  | SER254         | PHE254 | ALA569         | THR569 |
| THR27          | MET27  | ALA296         | GLU296 | VAL573         | ILE573 |
| GLU35          | LYS35  | VAL298         | LEU298 | GLY575         | ASP575 |
| TYR41          | HIS41  | GLN325         | GLU325 | LYS577         | ARG577 |
| ASN49          | ASP49  | GLU329         | ASN329 | ARG582         | GLY582 |
| THR55          | ASN55  | ASP367         | GLU367 | ASN586         | LYS586 |
| ASN63          | ASP63  | ILE407         | VAL407 | LYS596         | GLN596 |
| GLN86          | GLU86  | ALA412         | VAL412 | LYS600         | ARG600 |
| ALA99          | ILE99  | ILE421         | MET421 | ASN601         | LYS601 |
| SER106         | PRO106 | THR445         | ASN445 | PHE603         | TYR603 |
| THR118         | SER118 | GLN472         | GLU472 | ALA614         | SER614 |
| THR122         | ALA122 | GLU483         | LYS483 | LYS631         | ASN631 |
| ASN134         | LYS134 | TYR521         | PHE521 | VAL658         | GLU658 |
| ASN137         | LYS137 | GLN522         | GLU522 | ARG671         | TRP671 |
| SER170         | ALA170 | GLN526         | HIS526 | PHE684         | HIS684 |
| ALA193         | GLY193 | GLN531         | ARG531 | LYS689         | GLY689 |
| ASN194         | TYR194 | LYS534         | GLN534 | VAL691         | LEU691 |
| GLY205         | ARG205 | GLU536         | ASP536 | GLY751         | ALA751 |
| GLY211         | GLU211 | GLU549         | ASP549 | PHE762         | ILE762 |
| TYR215         | PRO215 | GLN552         | LYS552 | LYS769         | ARG769 |
| ILE223         | MET223 | LEU560         | VAL560 | LYS771         | THR771 |
| GLU224         | LYS224 | PRO565         | ALA565 | ALA782         | SER782 |
